# Supplementary material
Source: Springer Nature journal article supplement (https://www.springermedizin.de/resource/supplementary/12936_2009_945_MOESM8_ESM.pdf/9548594)

*An. gambiae* s.l.

*Cx.* species

ALTERNATIVE TRAP CATCH+1

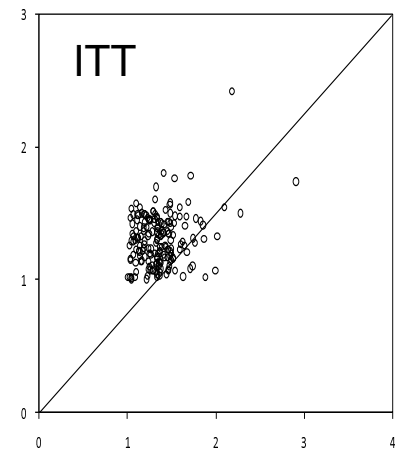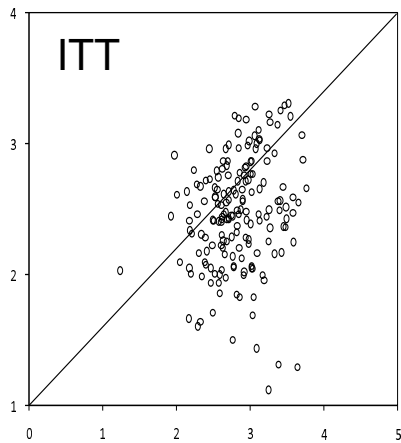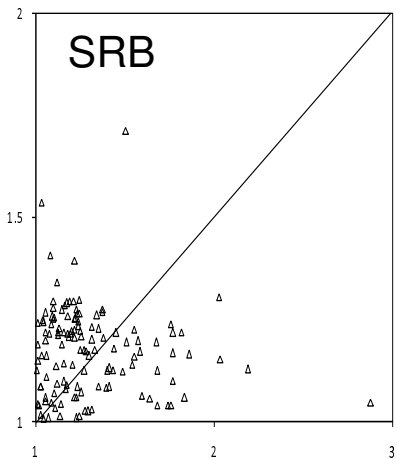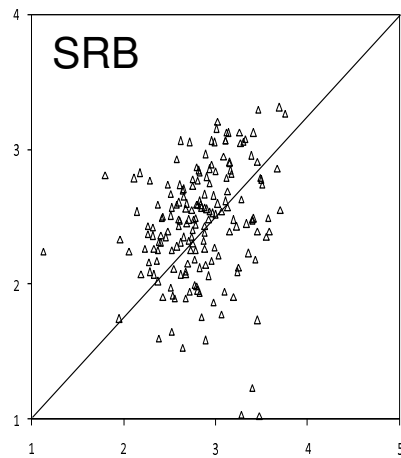

HLC- REFERENCE TRAP CATCH + 1

Supplement: MOESM8 [file 9548594]
